# Supplementary material for: Dietary squid paste supplementation promotes feed intake via brain-gut dynamic response in Chinese soft-shelled turtle Pelodiscus sinensis
Source: PeerJ. 2020 Apr 24;8:e9031. doi: 10.7717/peerj.9031 (PMC7185028; doi:10.7717/peerj.9031)
Supplement: Data S1 [file peerj-08-9031-s001.xlsx]

## Sheet: feed intake
	feed intake （g/per turtle）
CT	35.3533	34.2055	31.833	33.83
RP	35.7804	39.9214	32.2327	35.95
RPS	43.0083	39.3644	44.1535	42.21

## Sheet: CCK
GUT														BRAIN
	CCK (CT)														CCK (CT)
	CT				RP				RPS						CT				RP				RPS
F	32.1967	31.2145	31.4844	32.5022	30.534	30.7481	30.4526	29.6032	31.1401	30.8893	31.4096	30.9846		F	28.349	28.231	28.7239	28.5646	30.1023	29.39	30.3391	30.6263	31.7245	30.1102	31.5884	30.4788
3h	29.2086	29.8375	30.9448	31.8515	31.1403	30.5746	29.1184	28.3625	30.9576	31.4276	29.0481	29.1499		3h	26.0565	26.2409	26.2813	26.1829	27.1506	27.0174	28.0434	27.7116	28.8186	27.7857	28.0059	28.0701
6h	30.4372	30.7849	30.0447	29.9251	29.8249	30.1959	28.5066	28.6162	29.8165	29.8567	27.4924	27.6889		6h	26.6394	26.7984	27.3979	27.0344	27.7739	28.374	28.4341	28.9189	28.628	28.7194	29.4401	28.635
12h	30.977	31.1914	30.8049	31.3358	30.6132	30.5046	29.8059	29.2712	31.5572	31.4514	30.6699	30.7155		12h	25.7435	26.0349	27.5475	27.56	30.9452	29.8518	28.5896	28.6781	28.6206	28.8235	29.5582	28.9207
24h	29.4984	29.7011	30.1396	29.8259	29.8966	29.7866	32.7833	32.6198	31.6004	30.9266	32.3862	32.2667		24h	27.8652	28.693	27.9666	28.0952	29.7488	28.9858	29.0705	29.2272	30.8107	30.6547	29.127	31.29
	GAPDH (CT)														GAPDH (CT)
	CT				RP				RPS						CT				RP				RPS
F	20.692	20.4629	19.9723	19.5202	19.2772	19.1301	19.1766	19.1443	19.7371	19.1467	19.2688	19.3479		F	20.5981	20.6698	20.7352	20.9892	22.334	22.411	22.1887	22.6263	22.2637	21.9705	23.1607	22.4664
3h	20.3024	20.4734	21.7886	22.8226	21.8733	21.5543	19.6027	19.0544	21.4856	21.6063	19.5522	19.1589		3h	20.6041	20.4443	20.8299	20.6661	21.8453	21.4158	22.7281	22.2989	22.7167	22.2829	22.2041	22.141
6h	20.6698	20.7732	20.1088	20.3489	20.239	20.2492	18.8464	18.6544	19.6625	19.9217	17.4339	17.1899		6h	20.9668	21.0422	21.4455	21.489	21.6586	22.4948	22.2356	22.9315	22.2479	22.1911	22.146	22.1137
12h	20.7196	20.2325	19.7484	19.6818	20.4061	20.0062	19.1851	19.0848	19.0066	18.905	19.5263	19.4462		12h	19.6029	19.7117	20.8442	20.8696	23.4409	23.1865	22.0605	22.051	21.9079	21.9266	21.9693	22.0709
24h	18.6808	18.6289	18.6353	18.6635	18.4734	18.1744	21.3309	20.6927	19.9115	19.687	20.3856	20.3108		24h	20.5916	20.6104	20.9082	20.8908	22.2994	22.3941	22.215	22.2015	22.3518	22.207	21.8439	22.0947
	△Ct														△Ct
	CT				RP				RPS						CT				RP				RPS
F	11.5047	10.7516	11.5121	12.982	11.2568	11.618	11.276	10.4589	11.403	11.7425	12.1408	11.6368		F	7.75091	7.56121	7.98872	7.57537	7.76831	6.97897	8.15045	8	9.46079	8.13975	8.42763	8.01241
3h	8.90618	9.36416	9.15622	9.02888	9.26698	9.02031	9.51572	9.3081	9.47207	9.82122	9.49594	9.99094		3h	5.45244	5.79662	5.45141	5.51685	5.30529	5.60169	5.31527	5.41269	6.10188	5.50277	5.80176	5.92913
6h	9.76736	10.0117	9.93593	9.57622	9.58582	9.94671	9.66021	9.9618	10.1541	9.93504	10.0585	10.4991		6h	5.67259	5.75624	5.95239	5.54538	6.11531	5.87923	6.19855	5.98743	6.38008	6.5283	7.29404	6.52134
12h	10.2573	10.9589	11.0565	11.654	10.2071	10.4984	10.6207	10.1864	12.5506	12.5464	11.1437	11.2693		12h	6.14062	6.32315	6.70325	6.69042	7.50428	6.66525	6.52916	6.62708	6.71268	6.89698	7.58895	6.84976
24h	10.8175	11.0723	11.5043	11.1624	11.4232	11.6122	11.4524	11.9271	11.6889	11.2396	12.0006	11.956		24h	7.27357	8.08256	7.05842	7.20444	7.44937	6.59166	6.85552	7.02573	8.45892	8.44778	7.2831	9.19526
	△△Ct														△△Ct
	CT				RP				RPS						CT				RP				RPS
F	-0.185315	-0.938429	-0.17791	1.29203	-0.433168	-0.0720042	-0.413989	-1.23111	-0.287009	0.0525343	0.45084	-0.0532476		F	0.0509117	-0.138794	0.288723	-0.12463	0.0683064	-0.721031	0.450451	0.299995	1.76079	0.439748	0.727626	0.312407
3h	-2.78382	-2.32584	-2.53378	-2.66112	-2.42302	-2.66969	-2.17428	-2.3819	-2.21793	-1.86878	-2.19406	-1.69906		3h	-2.24756	-1.90338	-2.24859	-2.18315	-2.39471	-2.09831	-2.38473	-2.28731	-1.59812	-2.19723	-1.89824	-1.77087
6h	-1.92264	-1.67833	-1.75407	-2.11378	-2.10418	-1.74329	-2.02979	-1.7282	-1.53595	-1.75496	-1.63152	-1.19092		6h	-2.02741	-1.94376	-1.74761	-2.15462	-1.58469	-1.82077	-1.50145	-1.71257	-1.31992	-1.1717	-0.405959	-1.17866
12h	-1.43267	-0.731053	-0.633457	-0.0359532	-1.48294	-1.19156	-1.06926	-1.50357	0.860588	0.856358	-0.546312	-0.420706		12h	-1.55938	-1.37685	-0.996745	-1.00958	-0.195721	-1.03475	-1.17084	-1.07292	-0.987319	-0.803019	-0.11105	-0.850238
24h	-0.872456	-0.617737	-0.185721	-0.527573	-0.266817	-0.0777571	-0.237627	0.237081	-0.00107441	-0.450443	0.310641	0.265955		24h	-0.426429	0.382556	-0.641577	-0.495563	-0.250626	-1.10834	-0.844481	-0.674265	0.758921	0.747778	-0.416898	1.49526
	2(-△△Ct)														2(-△△Ct)
	CT				RP				RPS						CT				RP				RPS
F	1.13706	1.91644	1.13124	0.408376	1.3502	1.05118	1.33237	2.34748	1.22011	0.964241	0.731617	1.0376		F	0.965326	1.10098	0.818626	1.09023	0.953757	1.64836	0.731814	0.812255	0.295086	0.737264	0.603897	0.805297
3h	6.88674	5.01356	5.79088	6.32525	5.36292	6.36292	4.51361	5.21224	4.65224	3.65224	4.5759	3.24689		3h	4.7488	3.7409	4.75219	4.54143	5.25871	4.28208	5.22248	4.88144	3.02749	4.58599	3.72757	3.41259
6h	3.79117	3.20058	3.37309	4.32823	4.29954	3.34799	4.08346	3.31315	2.89979	3.37517	3.09839	2.28299		6h	4.07671	3.84708	3.35802	4.4525	2.99943	3.53269	2.83127	3.27745	2.49653	2.25277	1.32497	2.26367
12h	2.69946	1.65985	1.55128	1.02523	2.79518	2.28399	2.09836	2.83543	0.550728	0.552345	1.46035	1.33858		12h	2.94727	2.597	1.99549	2.01333	1.1453	2.04876	2.25142	2.10369	1.9825	1.74475	1.08001	1.8028
24h	1.83078	1.53447	1.13739	1.4415	1.20315	1.05538	1.17905	0.84846	1.00074	1.36646	0.806284	0.831648		24h	1.3439	0.767078	1.56003	1.40987	1.18972	2.15597	1.79562	1.59578	0.590938	0.59552	1.33505	0.354716

## Sheet: CCK1R
GUT														BRAIN
	CCK 1R(CT)														CCK1R (CT)
	CT				RP				RPS						CT				RP				RPS
F	29.1951	29.5305	27.9971	27.4132	28.5136	27.9191	28.1261	28.2832	27.8974	27.8573	27.7101	27.4549		F	30.2305	31.0802	30	29.8595	29.7411	29.9532	30.2532	30.233	30.1643	30.5627	30.5085	30.8214
3h	29.0538	28.7258	29.4165	28.9281	29.4051	30.0783	27.0649	27.684	29.676	29.4014	27.0061	27.424		3h	28.7914	28.1214	28.5562	27.5781	28.2425	28.193	29.3597	29.512	28.6817	29.3868	28.4214	29.1204
6h	30.0523	29.3508	28.0236	28.4332	28.6148	28.3673	27.5643	27.0274	29.0462	28.4229	24.9313	26.1302		6h	28.985	29.4556	28.7957	29.36	28.8711	28.933	29.3766	29.3521	30.0656	29.9117	28.5556	29.1819
12h	28.8069	28.2377	28.8581	28.2093	28.464	27.9118	27.7927	27.7366	27.0559	27.8206	27.846	27.9406		12h	29.3089	28.831	29.1617	29.0963	30.7142	30.5969	31.0331	30.9931	30.8083	30.7711	30.0926	30.3086
24h	27.4701	26.7644	27.0736	28.1149	27.4841	27.1985	29.6539	28.9358	28.3205	28.7272	29.1947	30.1052		24h	29.7678	29.5129	30.3463	30.8127	31.5195	31.2262	30.2041	30.4708	30.9019	31.5055	30.4678	30.3579
	GAPDH (CT)														GAPDH (CT)
	CT				RP				RPS						CT				RP				RPS
F	20.6323	20.9657	19.3312	18.6456	19.0546	19.6163	19.1795	19.2281	19.1665	18.6529	18.6168	18.6215		F	22.3996	22.026	22.1132	21.8523	21.9329	21.8892	22.79	22.6411	22.2347	22.5439	22.796	22.9309
3h	20.8319	20.5239	20.6277	20.5186	21.76	21.884	18.8616	18.8847	21.2085	20.2707	19.0512	18.874		3h	22.4804	22.0732	22.1826	21.5917	21.9752	21.9633	23.4755	23.357	22.2968	22.7991	21.699	22.5177
6h	21.1713	20.9628	19.9332	19.7786	19.9408	19.4802	19.1205	18.9552	19.7496	19.4921	16.2803	17.2972		6h	22.2485	22.4825	22.1967	22.2906	22.0042	22.1565	23.013	22.728	22.8388	22.708	21.7856	22.2969
12h	20.1987	20.0343	19.5832	19.7055	19.6386	19.2808	19.4396	19.2709	19.1543	19.0074	19.1779	19.6841		12h	21.9523	21.2403	21.8326	21.2985	22.7884	22.7577	23.445	22.7244	22.6687	22.7302	22.4103	22.4486
24h	18.4055	18.3267	18.9712	18.8614	18.2997	18.1829	20.5893	20.8024	19.3526	19.6027	20.7404	20.295		24h	21.9013	22.0367	22.3483	22.5227	23.1987	23.1334	22.3201	22.5234	23.1319	22.9836	22.5319	22.4902
	△Ct														△Ct
	CT				RP				RPS						CT				RP				RPS
F	8.56278	8.56474	8.66594	8.76759	9.45899	8.30284	8.94657	9.05513	8.73089	9.20444	9.0933	8.83337		F	7.8309	9.05423	7.88679	8.00728	7.8082	8.06399	7.46318	7.59194	7.92967	8.01883	7.71248	7.89049
3h	8.22191	8.20191	8.78881	8.40952	7.64512	8.19427	8.20327	8.79936	8.46755	9.13077	7.9549	8.55		3h	6.31094	6.04814	6.37367	5.98643	6.26732	6.22968	5.88423	6.15498	6.38495	6.58775	6.72236	6.6027
6h	8.88103	8.38802	8.09042	8.65456	8.67408	8.88714	8.44376	8.07228	9.29659	8.9308	8.65101	8.83292		6h	6.7365	6.97304	6.599	7.06936	6.8669	6.77653	6.36361	6.6241	7.22682	7.20367	6.77003	6.88499
12h	8.60824	8.20345	9.2749	8.50387	8.82532	8.63106	8.35317	8.46569	7.90162	8.81321	8.66812	8.25642		12h	7.3566	7.59074	7.32912	7.79775	7.9258	7.83927	7.58809	8.26868	8.13957	8.04094	7.68226	7.86
24h	9.06457	8.43772	8.10246	9.25346	9.18443	9.01556	9.06457	8.13346	8.96793	9.12449	8.45433	9.8102		24h	7.86649	7.47621	7.99797	8.29009	8.3208	8.09275	7.88403	7.94739	7.77	8.52193	7.93591	7.86775
	△△Ct														△△Ct
	CT				RP				RPS						CT				RP				RPS
F	0.0127752	0.0147392	0.115936	0.217591	0.908986	-0.247158	0.396566	0.505125	0.18089	0.654439	0.5433	0.283372		F	-0.369102	0.854228	-0.313205	-0.192722	-0.391797	-0.136014	-0.736824	-0.608057	-0.270332	-0.181169	-0.487516	-0.309511
3h	-0.328093	-0.34809	0.238811	-0.14048	-0.904883	-0.355731	-0.346728	0.249364	-0.0824533	0.580766	-0.595098	0		3h	-1.88906	-2.15186	-1.82633	-2.21357	-1.93268	-1.97032	-2.31577	-2.04502	-1.81505	-1.61225	-1.47764	-1.5973
6h	0.331029	-0.161984	-0.459581	0.10456	0.12408	0.337137	-0.106242	-0.477725	0.746589	0.380801	0.101007	0.282915		6h	-1.4635	-1.22696	-1.601	-1.13064	-1.3331	-1.42347	-1.83639	-1.5759	-0.973176	-0.996329	-1.42997	-1.31501
12h	0.0582364	-0.346554	0.724895	-0.0461348	0.275317	0.0810637	-0.19683	-0.0843147	-0.648384	0.263212	0.118123	-0.293578		12h	-0.843401	-0.609261	-0.870882	-0.402254	-0.2742	-0.360731	-0.611912	0.068682	-0.0604334	-0.159063	-0.51774	-0.339998
24h	0.514573	-0.112284	-0.44754	0.703459	0.634425	0.465556	0.514573	-0.416543	0.417928	0.574485	-0.0956693	1.2602		24h	-0.33351	-0.723794	-0.202026	0.0900864	0.120804	-0.10725	-0.315973	-0.252614	-0.429996	0.321928	-0.264086	-0.332245
	2(-△△Ct)														2(-△△Ct)
	CT				RP				RPS						CT				RP				RPS
F	0.991184	0.989836	0.922784	0.86	0.532559	1.18687	0.759664	0.704599	0.882158	0.635322	0.686199	0.821668		F	1.29155	0.553161	1.24246	1.14292	1.31203	1.09886	1.6665	1.52421	1.20609	1.1338	1.40203	1.23929
3h	1.25535	1.27287	0.847444	1.10227	1.87239	1.27963	1.27167	0.841267	1.05882	0.668609	1.51058	1		3h	3.70393	4.444	3.54634	4.63821	3.81763	3.91855	4.9787	4.1268	3.51871	3.05729	2.78492	3.02577
6h	0.794969	1.11882	1.37514	0.930088	0.917589	0.791611	1.07642	1.39255	0.596011	0.768011	0.932382	0.821928		6h	2.75777	2.34073	3.03353	2.18956	2.51944	2.68231	3.57114	2.98121	1.96316	1.99492	2.69442	2.48804
12h	0.960438	1.27152	0.605041	1.03249	0.826269	0.94536	1.14618	1.06018	1.56741	0.833231	0.921385	1.22568		12h	1.79428	1.52548	1.82878	1.32157	1.20932	1.28408	1.52828	0.953509	1.04278	1.11656	1.43171	1.26575
24h	0.7	1.08094	1.36371	0.614098	0.644197	0.724192	0.7	1.33472	0.748499	0.671526	1.06856	0.417486		24h	1.26008	1.65152	1.15031	0.939466	0.919675	1.07717	1.24485	1.19136	1.34723	0.8	1.20087	1.25897

## Sheet: NPY
BRAIN
	NPY (CT)
	CT				RP				RPS
F	20.2293	20.0344	20.5811	20.4493	21.6997	21.5172	21.0792	21.9251	21.0676	21.0626	22.4377	21.0852
3h	21.4203	20.8711	20.9551	21.203	21.7338	21.956	23.2687	22.5681	22.244	21.9145	22.0269	21.4977
6h	20.2049	20.0311	20.6339	20.7634	20.5771	21.1594	22.1433	22.2492	20.9381	22.4935	20.9579	20.9371
12h	19.1004	19.2101	19.4426	20.1977	21.9511	21.8727	20.7821	21.0322	20.3126	20.2972	20.1151	20.5409
24h	19.7668	19.8047	20.5954	20.3595	21.7786	21.9375	22.1823	21.542	21.1034	21.0583	20.7654	20.9137
	GAPDH (CT)
	CT				RP				RPS
F	20.5981	20.6698	20.7352	20.9892	22.334	22.411	22.1887	22.6263	22.2637	21.9705	23.1607	22.4664
3h	20.6041	20.4443	20.8299	20.6661	21.8453	21.4158	22.7281	22.2989	22.7167	22.2829	22.2041	22.141
6h	20.9668	21.0422	21.4455	21.489	21.6586	22.4948	22.2356	22.9315	22.2479	22.1911	22.146	22.1137
12h	20.245	20.4272	20.8442	20.8696	23.4409	23.1865	22.0605	22.051	21.9079	21.9266	21.9693	22.0709
24h	20.5916	20.6104	20.9082	20.8908	22.2994	22.3941	22.215	22.2015	22.3518	22.207	21.8439	22.0947
	△Ct
-0.424555	CT				RP				RPS
F	-0.368794	-0.635426	-0.154133	-0.539867	-0.634306	-0.893854	-1.10945	-0.701195	-1.19608	-0.907934	-0.723031	-1.38123
3h	0.816168	0.426769	0.125192	0.536936	-0.111437	0.540238	0.5406	0.269134	-0.472654	-0.368422	-0.177247	-0.643311
6h	-0.761849	-1.01104	-0.811617	-0.725613	-1.08152	-1.33537	-0.0922758	-0.682225	-1.30984	0.302482	-1.18813	-1.17652
12h	-1.14466	-1.2171	-1.40163	-0.671904	-1.48975	-1.31387	-1.27839	-1.01875	-1.59537	-1.62936	-1.85416	-1.53001
24h	-0.824814	-0.805754	-0.3128	-0.531245	-0.520797	-0.456665	-0.0326579	-0.659508	-1.24842	-1.14861	-1.07846	-1.18103
	△△Ct
	CT				RP				RPS
F	0.0512063	-0.215426	0.265867	-0.119867	-0.214306	-0.473854	-0.689449	-0.281195	-0.776085	-0.487934	-0.303031	-0.961233
3h	1.23617	0.846769	0.545192	0.956936	0.308563	0.960238	0.9606	0.689134	-0.0526538	0.0515783	0.242753	-0.223311
6h	-0.341849	-0.59104	-0.391617	-0.305613	-0.661516	-0.915375	0.327724	-0.262225	-0.889844	0.722482	-0.768125	-0.756517
12h	-0.724662	-0.797104	-0.981626	-0.251904	-1.06975	-0.893873	-0.858395	-0.598749	-1.17537	-1.20936	-1.43416	-1.11001
24h	-0.404814	-0.385754	0.1072	-0.111245	-0.100797	-0.0366651	0.387342	-0.239508	-0.828418	-0.728615	-0.658462	-0.76103
	2(-△△Ct)
1.01113	CT				RP				RPS
F	0.965129	1.16105	0.831699	1.08664	1.16015	1.38881	1.61267	1.2152	1.71248	1.40244	1.23373	1.94697
3h	0.424499	0.556029	0.6853	0.51515	0.807446	0.513972	0.513843	0.620226	1.03717	0.96488	0.845131	1.16741
6h	1.26738	1.50633	1.31186	1.23594	1.58174	1.88606	0.796792	1.19933	1.85298	0.606054	1.70305	1.68941
12h	1.65251	1.73761	1.97469	1.19078	2.09908	1.85816	1.81302	1.5144	2.25851	2.31236	2.70225	2.15847
24h	1.32392	1.30654	0.928388	1.08016	1.07237	1.02574	0.764537	1.18059	1.77574	1.65705	1.5784	1.6947

## Sheet: POMC
BRAIN
	POMC (CT)
	CT				RP				RPS
F	26.9188	26.8722	26.8903	26.5827	26.985	27.1321	26.4019	27.3776	26.9669	27.0608	27.2014	27.3325
3h	25.7043	25.5091	26.3397	25.6625	24.7708	24.6761	26.9173	26.4895	26.2784	26.5126	26.4262	26.1073
6h	26.6099	26.3005	26.3436	26.3938	27.3245	27.3651	26.6155	27.101	26.4942	26.9497	26.7781	26.8727
12h	27.4557	27.9775	27.0576	27.2331	27.7321	27.4602	27.2314	26.9524	26.3392	26.3197	26.413	26.2199
24h	26.7352	26.22	27.6024	26.7359	26.9845	27.1434	26.507	26.6598	26.6919	26.6815	26.6793	26.7765
	GAPDH (CT)
	CT				RP				RPS
F	21.0657	20.6988	20.8469	20.9017	21.2336	21.5555	20.9144	21.2102	20.9569	20.9666	21.467	21.3477
3h	20.498	20.6336	21.425	20.8116	20.1464	19.9769	21.6901	21.8126	21.2955	21.247	21.1964	20.9539
6h	20.7553	20.698	21.0844	21.1261	21.1849	20.8509	20.9406	21.1955	20.9698	21.2239	20.8138	20.7993
12h	21.6269	22.1804	20.8196	21.1246	22.2721	21.9452	21.4023	21.381	20.8645	20.9078	20.7324	20.6506
24h	20.9569	20.6441	21.2703	21.2766	21.481	21.3542	20.9835	21.0161	21.1572	21.3066	21.004	21.0238
	△Ct
	CT				RP				RPS
F	5.85312	6.17346	6.04337	5.68097	5.75137	5.57664	5.48744	6.1674	6.00997	6.09427	5.73448	5.98478
3h	5.20633	4.87544	4.91462	4.85095	4.62445	4.69918	5.22713	4.67697	4.98287	5.26554	5.22982	5.15341
6h	5.85466	5.60258	5.2592	5.26772	6.13965	6.51419	5.67489	5.90553	5.5244	5.72581	5.96423	6.07339
12h	5.82878	5.79713	6.23799	6.10851	5.45993	5.515	5.82917	5.57145	5.47473	5.41188	5.68055	5.5693
24h	5.7783	5.57592	6.33214	5.45937	5.5035	5.78919	5.52346	5.64368	5.5347	5.37491	5.67531	5.75268
	△△Ct
	CT				RP				RPS
F	-0.0868789	0.233456	0.103369	-0.259028	-0.188634	-0.363357	-0.452564	0.2274	0.0699656	0.154269	-0.205524	0.0447772
3h	-0.733667	-1.06456	-1.02538	-1.08905	-1.31555	-1.24082	-0.712869	-1.26303	-0.957129	-0.674461	-0.710184	-0.786595
6h	-0.0853376	-0.337425	-0.680799	-0.67228	0.199654	0.574192	-0.265112	-0.0344693	-0.4156	-0.214188	0.0242313	0.133393
12h	-0.111225	-0.142875	0.297993	0.168505	-0.480066	-0.425003	-0.110832	-0.368547	-0.465265	-0.528116	-0.259452	-0.370704
24h	-0.161698	-0.36408	0.392143	-0.480632	-0.436504	-0.150814	-0.416541	-0.29632	-0.405304	-0.565092	-0.264688	-0.187317
	2(-△△Ct)
	CT				RP				RPS
F	1.06207	0.850595	0.930857	1.19667	1.13968	1.28642	1.36847	0.854173	0.952661	0.898588	1.15311	0.96944
3h	1.66286	2.09153	2.0355	2.12733	2.48898	2.36333	1.63906	2.4	1.94144	1.596	1.63601	1.725
6h	1.06094	1.2635	1.60303	1.59359	0.870759	0.671662	1.20173	1.02418	1.33385	1.16005	0.983344	0.911685
12h	1.08014	1.1041	0.813383	0.889764	1.39481	1.34258	1.07985	1.29105	1.38057	1.44205	1.19702	1.29298
24h	1.1186	1.28706	0.761997	1.39535	1.35332	1.1102	1.33472	1.22801	1.32437	1.47948	1.20138	1.13864

## Sheet: CART
BRAIN
	CART (CT)
	CT				RP				RPS
F	24.8715	24.3927	24.4833	23.9799	25.2829	25.2322	24.768	24.506	24.9797	25.0366	25.3771	25.5287
3h	23.2398	23.4097	24.3568	23.7287	22.8532	22.7501	24.8588	24.4982	24.4092	24.5398	24.1749	23.8807
6h	24.6849	24.5559	24.4149	24.4998	24.3757	24.6962	24.9307	24.6027	24.4266	24.5267	24.9678	24.976
12h	25.6952	25.9985	24.1188	24.2893	25.4999	25.6377	25.0047	24.8055	24.9927	24.7924	24.7373	24.6986
24h	24.5575	23.5619	24.8427	24.6146	24.6225	24.7463	23.9423	24.2877	24.8914	24.938	24.9409	24.8387
	GAPDH (CT)
	CT				RP				RPS
F	21.0657	20.6988	20.8469	20.9017	21.2336	21.5555	20.9144	21.2102	20.9569	20.9666	21.467	21.3477
3h	20.498	20.6336	21.425	20.8116	20.1464	19.9769	21.6901	21.8126	21.2955	21.247	21.1964	20.9539
6h	20.7553	20.698	21.0844	21.1261	21.1849	20.8509	20.9406	21.1955	20.9698	21.2239	20.8138	20.7993
12h	21.6269	22.1804	20.8196	21.1246	22.2721	21.9452	21.4023	21.381	20.8645	20.9078	20.7324	20.6506
24h	20.9569	20.6441	21.2703	21.2766	21.481	21.3542	20.9835	21.0161	21.1572	21.3066	21.004	21.0238
	△Ct
	CT				RP				RPS
F	3.80584	3.6939	3.63641	3.0782	4.04926	3.6767	3.85359	3.29581	4.02279	4.07008	3.91011	4.181
3h	2.74176	2.77607	2.93179	2.91709	2.70682	2.77317	3.16861	2.68564	3.11371	3.2928	2.97852	2.92685
6h	3.92957	3.85791	3.33058	3.37363	3.19086	3.84527	3.99005	3.40717	3.45677	3.30288	4.154	4.17677
12h	4.06837	3.81812	3.29922	3.1647	3.22779	3.69246	3.60243	3.42449	4.12818	3.88459	4.00488	4.04799
24h	3.60062	2.91777	3.57239	3.33806	3.14149	3.39212	2.95881	3.27164	3.73422	3.6314	3.93693	3.81485
	△△Ct
	CT				RP				RPS
F	0.255838	0.143899	0.086406	-0.471796	0.499255	0.126701	0.303594	-0.254188	0.472789	0.520076	0.360109	0.631004
3h	-0.808245	-0.773935	-0.618212	-0.632908	-0.843181	-0.776833	-0.381392	-0.864363	-0.436293	-0.257201	-0.571485	-0.62315
6h	0.379569	0.307912	-0.219424	-0.176373	-0.359144	0.295266	0.440053	-0.142833	-0.0932343	-0.247118	0.604001	0.626773
12h	0.518365	0.268125	-0.250778	-0.385298	-0.322214	0.142457	0.0524285	-0.125512	0.578178	0.334586	0.454881	0.497987
24h	0.0506242	-0.632231	0.0223936	-0.211938	-0.408509	-0.157878	-0.591185	-0.278356	0.184221	0.0814013	0.38693	0.264846
	2(-△△Ct)
	CT				RP				RPS
F	0.837501	0.90507	0.941866	1.38684	0.707472	0.915924	0.810231	1.19266	0.72057	0.697335	0.779106	0.645727
3h	1.75108	1.70993	1.53497	1.55069	1.794	1.71337	1.3026	1.82054	1.35312	1.19516	1.48605	1.54023
6h	0.768667	0.80781	1.16427	1.13004	1.28266	0.814922	0.737107	1.10407	1.06676	1.18683	0.657927	0.647623
12h	0.698163	0.830398	1.18985	1.30613	1.25025	0.905975	0.964312	1.09089	0.669809	0.793011	0.72957	0.708094
24h	0.965518	1.54996	0.984598	1.15824	1.32731	1.11564	1.50648	1.21281	0.880124	0.945139	0.764755	0.832287

## Sheet: PYY
BRAIN														GUT
	PYY (CT)														PYY (CT)
	CT				RP				RPS						CT				RP				RPS
F	26.0988	25.6458	26.1782	26.4873	26.2371	25.9277	26.0613	25.6968	26.202	26.0887	26.3631	27.5956		F	28.0431	27.8433	25.5945	25.2773	26.9477	25.1333	26.3301	25.8425	25.8645	25.4364	25.6454	26.0523
3h	27.2522	27.8354	26.9801	26.9496	28.4463	27.7319	29.8794	28.1819	27.5612	29.4904	28.3123	27.4211		3h	29.3292	29.9404	31.6213	30.9516	30.2742	29.3247	29.2971	28.6429	29.4945	32.0469	28.8527	27.9673
6h	25.3292	25.5993	25.5692	25.7521	23.7286	23.6926	25.58	25.2882	25.5628	25.1915	25.4303	25.5642		6h	25.2568	25.1994	25.7108	25.4724	25.2379	26.0547	24.0042	24.2611	24.1356	25.0496	22.2459	22.4581
12h	23.2074	23.3632	24.6995	25.0998	25.0502	24.5588	24.9178	25.1386	24.7606	24.6514	24.3391	25.5028		12h	25.6584	25.7796	24.817	24.7739	27.0941	25.1632	24.5565	24.7404	24.3781	24.1987	24.9056	24.7743
24h	26.1451	26.0186	26.0595	26.3358	26.9981	26.9229	26.4725	26.9268	25.8578	25.5982	25.1685	26.0185		24h	24.6148	25.1938	25.0501	25.4812	25.5538	25.7205	27.6395	27.2658	26.5739	25.8233	27.1798	27.2099
	GAPDH (CT)														GAPDH (CT)
	CT				RP				RPS						CT				RP				RPS
F	20.8934	20.5068	21.0591	20.9543	20.3005	20.3797	20.8268	21.0198	20.4463	20.639	21.3838	21.4016		F	20.4995	20.875	19.0898	18.7794	19.2772	19.1301	19.1766	19.1443	19.7371	19.1467	19.2688	19.3479
3h	20.3432	20.5396	20.6656	20.8549	21.2853	20.5709	21.8679	21.7424	21.058	20.9315	21.106	21.0752		3h	20.5239	20.3483	21.0156	20.7027	21.8733	21.5543	19.6027	19.0544	21.4856	21.6063	19.5522	19.1589
6h	20.841	20.7133	21.239	21.3531	19.3514	19.2918	21.5446	21.0254	20.6053	20.4478	20.8973	21.0515		6h	20.1141	20.3763	20.1594	19.9516	20.239	20.2492	18.8464	18.6544	19.6625	19.9217	17.4339	17.1899
12h	19.6029	19.7117	21.3922	21.1432	21.2312	21.2228	20.8348	20.9782	20.9676	20.8173	20.9861	20.9978		12h	20.0275	20.2685	19.5367	19.4724	20.4061	20.0062	19.1851	19.0848	19.0066	18.905	19.5263	19.4462
24h	20.4518	20.3183	21.0316	21.1083	20.7156	20.8093	21.5586	21.4214	20.8917	20.7727	20.8542	20.911		24h	18.3001	18.1277	18.8263	18.7235	18.4734	18.1744	21.3309	20.6927	19.9115	19.687	20.3856	20.3108
	△Ct														△Ct
	CT				RP				RPS						CT				RP				RPS
F	5.20541	5.13899	5.11909	5.53295	5.93661	5.54801	5.23451	4.67694	5.75566	5.44966	4.97933	6.19395		F	7.54365	6.96826	6.50463	6.49787	7.67049	6.00314	7.15356	6.69822	6.12743	6.2897	6.37663	6.70438
3h	6.90896	7.29582	6.31445	6.09468	7.161	7.161	8.01153	6.43957	6.50325	8.55892	7.20622	6.34589		3h	8.80528	9.59209	10.6057	10.2489	8.40094	7.77041	9.69441	9.58846	8.00894	10.4406	9.30046	8.8084
6h	4.48821	4.88592	4.3302	4.39902	4.37718	4.40082	4.03538	4.26285	4.95751	4.74364	4.53298	4.51268		6h	5.14268	4.8231	5.55144	5.52075	4.99881	5.80545	5.15785	5.60671	4.4731	5.12791	4.81207	5.26824
12h	3.60455	3.65148	3.30738	3.95661	3.81899	3.33593	4.08299	4.16039	3.79302	3.83411	3.35301	4.50499		12h	5.63083	5.51107	5.28032	5.30151	6.68801	5.15706	5.37136	5.6556	5.37148	5.29373	5.37931	5.32808
24h	5.69335	5.70025	5.02792	5.22745	6.28245	6.11361	4.91386	5.50544	4.9661	4.82547	4.31432	5.10753		24h	6.3147	7.06611	6.22383	6.75774	7.08039	7.54609	6.30854	6.57308	6.66242	6.13626	6.7942	6.89913
	△△Ct														△△Ct
	CT				RP				RPS						CT				RP				RPS
F	-0.0445914	-0.111011	-0.130912	0.282945	0.686614	0.298013	-0.0154876	-0.573063	0.505658	0.199659	-0.270672	0.943952		F	0.66365	0.088259	-0.375374	-0.382126	0.790489	-0.87686	0.273556	-0.181781	-0.752566	-0.590298	-0.503366	-0.175615
3h	1.65896	2.04582	1.06445	0.844676	1.911	1.911	2.76153	1.18957	1.25325	3.30892	1.95622	1.09589		3h	1.92528	2.71209	3.72568	3.3689	1.52094	0.890412	2.81441	2.70846	1.12894	3.56056	2.42046	1.9284
6h	-0.761787	-0.364084	-0.919805	-0.850976	-0.872816	-0.849182	-1.21462	-0.987148	-0.292491	-0.506359	-0.717018	-0.73732		6h	-1.73732	-2.0569	-1.32856	-1.35925	-1.88119	-1.07455	-1.72215	-1.27329	-2.4069	-1.75209	-2.06793	-1.61176
12h	-1.64545	-1.59852	-1.94262	-1.29339	-1.43101	-1.91407	-1.16701	-1.08961	-1.45698	-1.41589	-1.89699	-0.745007		12h	-1.24917	-1.36893	-1.59968	-1.57849	-0.191992	-1.72294	-1.50864	-1.2244	-1.50852	-1.58627	-1.50069	-1.55192
24h	0.443349	0.45025	-0.222079	-0.0225496	1.03245	0.863611	-0.336136	0.255436	-0.283898	-0.424531	-0.935683	-0.142468		24h	-0.565299	0.186109	-0.656166	-0.122257	0.200395	0.666086	-0.571456	-0.306915	-0.217579	-0.743739	-0.0857985	0.0191335
	2(-△△Ct)														2(-△△Ct)
	CT				RP				RPS						CT				RP				RPS
F	1.03139	1.07998	1.09499	0.821911	0.62131	0.813372	1.01079	1.48768	0.704339	0.870756	1.20637	0.519807		F	0.631279	0.940657	1.29718	1.30326	0.578148	1.83637	0.827278	1.13428	1.68479	1.50556	1.41752	1.12945
3h	0.316667	0.242185	0.478154	0.556836	0.265908	0.265908	0.147468	0.438435	0.419502	0.100906	0.257702	0.467847		3h	0.263289	0.152609	0.0755892	0.0967966	0.34846	0.53946	0.14216	0.152993	0.45725	0.0847549	0.186796	0.26272
6h	1.69559	1.28706	1.89186	1.80372	1.83123	1.80148	2.3208	1.98226	1.22475	1.42046	1.64378	1.66708		6h	3.33415	4.16093	2.51151	2.56551	3.68378	2.10607	3.29929	2.41713	5.30333	3.36846	4.19286	3.05624
12h	3.12846	3.02832	3.84403	2.45103	2.69634	3.7687	2.24546	2.12816	2.74533	2.66824	3.72436	1.67598		12h	2.37705	2.5828	3.03077	2.98657	1.14234	3.30109	2.84541	2.33659	2.84517	3.00272	2.82978	2.93208
24h	0.735425	0.731916	1.16641	1.01575	0.488879	0.549575	1.26237	0.837734	1.21748	1.34214	1.9128	1.10379		24h	1.47969	0.878973	1.57589	1.08844	0.870312	0.630214	1.48602	1.23706	1.16278	1.67451	1.06127	0.986825

## Sheet: GLP1R
BRAIN														GUT
	GLP1R (CT)														GLP1R(CT)
	CT				RP				RPS						CT				RP				RPS
F	26.2918	25.7063	26.4651	26.5793	25.8702	25.6728	25.9249	26.2661	26.0769	26.4031	26.5973	26.4977		F	33.7024	34.2524	31.8373	31.3372	31.8781	31.275	31.8405	32.2725	32.0817	31.6868	32.8226	31.9483
3h	24.936	24.9327	24.6607	25.4829	25.5692	25.1112	26.7444	26.0013	25.6742	25.4141	26.1833	25.8881		3h	32.2797	33.0514	33.3222	33.8287	34.194	33.6555	31.9748	32.2432	33.4828	34.4467	32.3351	31.6199
6h	24.9872	24.9067	25.1227	25.2065	23.2512	24.8924	25.746	25.0489	24.6269	24.3702	24.6796	24.762		6h	32.4834	33.2223	32.3388	33.0568	33.0177	32.1198	31.1665	31.634	32.5493	33.9943	30.7059	29.6639
12h	24.2635	25.2915	26.4744	26.3228	25.8863	26.3011	25.9868	26.4876	26.4404	26.1096	26.2146	26.2729		12h	32.6088	33.2792	32.7011	32.556	33.2599	32.3588	32.4771	32.7634	32.6776	32.027	32.4469	32.8499
24h	25.9142	26.0594	26.5693	26.7677	26.4392	27.4744	26.9488	26.7814	26.5952	26.6765	26.2047	26.4046		24h	31.0012	31.0683	30.337	31.2433	30.9922	30.7076	34.5676	34.1028	32.4873	32.2681	33.9414	33.3413
	GAPDH (CT)														GAPDH (CT)
	CT				RP				RPS						CT				RP				RPS
F	20.8934	20.5068	21.0591	20.9543	20.3005	20.3797	20.8268	21.0198	20.4463	20.639	21.3838	21.4016		F	20.4995	20.875	19.0898	18.7794	19.2772	19.1301	19.1766	19.1443	19.7371	19.1467	19.2688	19.3479
3h	20.3432	20.5396	20.6656	20.8549	21.2853	20.5709	21.8679	21.7424	21.058	20.9315	21.106	21.0752		3h	20.5239	20.3483	21.0156	20.7027	21.8733	21.5543	19.6027	19.0544	21.4856	21.6063	19.5522	19.1589
6h	20.841	20.7133	21.239	21.3531	19.3514	19.2918	21.5446	21.0254	20.6053	20.4478	20.8973	21.0515		6h	20.1141	20.3763	20.1594	19.9516	20.239	20.2492	18.8464	18.6544	19.6625	19.9217	17.4339	17.1899
12h	19.6029	19.7117	21.3922	21.1432	21.2312	21.2228	20.8348	20.9782	20.9676	20.8173	20.9861	20.9978		12h	20.0275	20.2685	19.5367	19.4724	20.4061	20.0062	19.1851	19.0848	19.0066	18.905	19.5263	19.4462
24h	20.4518	20.3183	21.0316	21.1083	20.7156	20.8093	21.5586	21.4214	20.8917	20.7727	20.8542	20.911		24h	18.3001	18.1277	18.8263	18.7235	18.4734	18.1744	21.3309	20.6927	19.9115	19.687	20.3856	20.3108
	△Ct														△Ct
	CT				RP				RPS						CT				RP				RPS
F	5.39841	5.19949	5.40598	5.62502	5.56977	5.29309	5.0981	5.24628	5.63053	5.76407	5.21344	5.09609		F	13.2029	13.3774	12.7475	12.5578	12.6009	12.1449	12.664	13.1282	12.3446	12.5401	13.5538	12.6004
3h	4.59274	4.39311	3.99507	4.628	4.28386	4.54025	4.8765	4.25897	4.61625	4.48261	5.07731	4.81297		3h	11.7558	12.7031	12.3066	13.126	12.3207	12.1012	12.3721	13.1888	11.9972	12.8404	12.783	12.4609
6h	4.14622	4.19339	3.88366	3.85342	3.89976	5.60056	4.20135	4.02354	4.02164	3.92234	3.78227	3.71049		6h	12.3693	12.846	12.1794	13.1052	12.7786	11.8706	12.3201	12.9796	12.8869	14.0727	13.272	12.4741
12h	4.66069	5.57978	5.08228	5.17962	4.65518	5.07829	5.15199	5.50937	5.47281	5.29232	5.2285	5.27501		12h	12.5813	13.0107	13.1644	13.0835	12.8538	12.3526	13.2919	13.6786	13.671	13.122	12.9207	13.4036
24h	5.46239	5.74109	5.53768	5.65942	5.72361	6.66505	5.39019	5.36003	5.70347	5.90372	5.35053	5.49368		24h	12.7011	12.9406	11.5108	12.5198	12.5188	12.5332	13.2367	13.4101	12.5758	12.5811	13.5558	13.0306
	△△Ct														△△Ct
	CT				RP				RPS						CT				RP				RPS
F	-0.0115872	-0.21051	-0.0040152	0.215017	0.159771	-0.116912	-0.311897	-0.163723	0.220531	0.354068	-0.19656	-0.31391		F	0.232935	0.40736	-0.222533	-0.41224	-0.369135	-0.825114	-0.30605	0.158172	-0.625409	-0.42991	0.583822	-0.366638
3h	-0.817265	-1.01689	-1.41493	-0.782002	-1.12614	-0.869745	-0.533504	-1.15103	-0.793751	-0.927394	-0.332692	-0.597031		3h	-1.21416	-0.266876	-0.663441	0.156025	-0.649304	-0.868809	-0.597913	0.218768	-0.972751	-0.129613	-0.187046	-0.506053
6h	-1.26378	-1.21661	-1.52634	-1.55658	-1.51024	0.190563	-1.20865	-1.38646	-1.38836	-1.48766	-1.62773	-1.69951		6h	-0.600679	-0.124005	-0.790599	0.135171	-0.191354	-1.09942	-0.649914	0.00959256	-0.0831289	1.10265	0.301995	-0.492946
12h	-0.749309	0.16978	-0.327723	-0.230383	-0.754824	-0.331705	-0.258014	0.0993745	0.0628125	-0.117682	-0.181503	-0.134992		12h	-0.388748	0.0407048	0.194415	0.113548	-0.116188	-0.617399	0.321928	0.708552	0.700978	0.152003	-0.0493324	0.436647
24h	0.0523946	0.331089	0.127676	0.249424	0.313612	1.25505	-0.0198101	-0.0499667	0.293468	0.493719	-0.0594716	0.0836808		24h	-0.268852	-0.0293751	-1.45922	-0.450202	-0.451186	-0.4368	0.266656	0.440103	-0.394218	-0.388911	0.585806	0.063581
	2(-△△Ct)														2(-△△Ct)
	CT				RP				RPS						CT				RP				RPS
F	1.00806	1.1571	1.00279	0.861536	0.895167	1.08441	1.24134	1.12017	0.858249	0.782375	1.14596	1.24307		F	0.850902	0.754002	1.16678	1.33075	1.29158	1.77168	1.23632	0.89616	1.54265	1.34715	0.667194	1.28934
3h	1.76206	2.02356	2.66647	1.71951	2.18273	1.82734	1.44744	2.22072	1.73358	1.90184	1.25936	1.5126		3h	2.32005	1.2032	1.58386	0.897495	1.56841	1.82615	1.51353	0.859299	1.96258	1.094	1.13843	1.42016
6h	2.40123	2.324	2.88054	2.94155	2.84857	0.876264	2.31121	2.61436	2.61781	2.80434	3.09027	3.2479		6h	1.51643	1.08976	1.72979	0.910562	1.14183	2.14268	1.56907	0.993373	1.05931	0.46566	0.81113	1.40732
12h	1.68099	0.888978	1.25503	1.17315	1.68743	1.2585	1.19583	0.933438	0.957396	1.08499	1.13407	1.09809		12h	1.30926	0.97218	0.873927	0.924312	1.08387	1.53411	0.8	0.611934	0.615155	0.9	1.03479	0.73885
24h	0.964334	0.794936	0.915305	0.841232	0.804625	0.418979	1.01383	1.03524	0.815938	0.710192	1.04208	0.943647		24h	1.20485	1.02057	2.74961	1.36623	1.36716	1.3536	0.831244	0.737082	1.31423	1.3094	0.666277	0.956886

## Sheet: LeptinR
BRAIN														GUT
	LeptinR (CT)														LeptinR(CT)
	CT				RP				RPS						CT				RP				RPS
F	23.4619	23.4897	23.6093	23.4224	25.1452	25.0271	24.9588	24.841	25.3356	25.2351	26.6477	26.2164		F	25.0834	25.0916	24.2453	23.9475	23.8984	23.9765	23.7244	23.7343	24.0481	23.9735	23.4197	23.2051
3h	21.6742	21.6729	22.1149	21.901	23.1131	22.6948	23.6927	23.3522	24.0882	23.7699	23.5211	23.7535		3h	22.9922	23.4711	24.6823	25.3787	25.0277	24.3214	22.5012	21.5938	24.9068	25.0693	22.4492	22.1181
6h	23.4507	23.4143	24.405	24.2187	24.3376	24.5224	25.6896	25.7574	24.4758	24.4277	24.263	24.9289		6h	24.084	24.1403	23.1325	23.7498	23.8151	24.0944	22.4782	21.7798	24.2755	23.8078	21.4993	21.5547
12h	22.6116	22.5072	23.9537	24.0191	25.9195	25.8245	24.4911	24.8359	24.9799	25.1911	24.5986	25.5579		12h	25.0922	24.2666	25.0006	24.9775	24.9646	24.5722	23.5421	23.3232	23.3477	23.1571	24.1586	24.202
24h	23.9627	23.8685	24.4152	24.1739	24.9881	24.9886	25.6134	25.3995	25.8387	25.957	25.1085	26.2791		24h	23.565	23.3612	23.3919	23.0281	23.4588	22.9806	26.007	25.966	23.9701	24.134	24.7962	24.958
	GAPDH (CT)														GAPDH (CT)
	CT				RP				RPS						CT				RP				RPS
F	20.5981	20.6698	20.7352	20.9892	22.334	22.411	22.1887	22.6263	22.2637	21.9705	23.1607	22.4664		F	20.692	20.4629	19.9723	19.5202	19.2772	19.1301	19.1766	19.1443	19.7371	19.1467	19.2688	19.3479
3h	20.6041	20.4443	20.8299	20.6661	21.8453	21.4158	22.7281	22.2989	22.7167	22.2829	22.2041	22.141		3h	20.3024	20.4734	21.7886	22.8226	21.8733	21.5543	19.6027	19.0544	21.4856	21.6063	19.5522	19.1589
6h	20.9668	21.0422	21.4455	21.489	21.6586	22.4948	22.2356	22.9315	22.2479	22.1911	22.146	22.1137		6h	20.6698	20.7732	20.1088	20.3489	20.239	20.2492	18.8464	18.6544	19.6625	19.9217	17.4339	17.1899
12h	19.6029	19.7117	20.8442	20.8696	23.4409	23.1865	22.0605	22.051	21.9079	21.9266	21.9693	22.0709		12h	20.7196	20.2325	19.7484	19.6818	20.4061	20.0062	19.1851	19.0848	19.0066	18.905	19.5263	19.4462
24h	20.5916	20.6104	20.9082	20.8908	22.2994	22.3941	22.215	22.2015	22.3518	22.207	21.8439	22.0947		24h	18.6808	18.6289	18.6353	18.6635	18.4734	18.1744	21.3309	20.6927	19.9115	19.687	20.3856	20.3108
	△Ct														△Ct
	CT				RP				RPS						CT				RP				RPS
F	2.86383	2.81989	2.8741	2.43317	2.81114	2.61611	2.77016	2.21471	3.07193	3.26457	3.48697	3.75		F	4.39138	4.62869	4.27304	4.42726	4.6212	4.84636	4.54783	4.59	4.31102	4.82679	4.15096	3.85718
3h	1.07012	1.22859	1.28501	1.23497	1.26786	1.27905	0.964575	1.05324	1.37149	1.48697	1.31704	1.6125		3h	2.68982	2.99772	2.89368	2.5561	3.15443	2.76708	2.89855	2.53937	3.42128	3.46294	2.89704	2.95921
6h	2.4839	2.37215	2.9595	2.72971	2.67903	2.02764	3.45399	2.82592	2.22787	2.23666	2.11691	2.81529		6h	3.41421	3.3671	3.0237	3.40086	3.57605	3.84514	3.63177	3.12542	4.613	3.88617	4.06538	4.36487
12h	3.00872	2.79543	3.1095	3.14949	2.47866	2.63792	2.43062	2.78489	3.07193	3.26457	2.62931	3.48697		12h	4.37258	4.03409	5.25219	5.29575	4.55846	4.56606	4.35696	4.23842	4.34103	4.2521	4.63235	4.75579
24h	3.37107	3.25806	3.50703	3.2831	2.68873	2.59444	3.39842	3.19806	3.48697	3.75	3.26457	4.1844		24h	4.88419	4.73233	4.75656	4.3646	4.98541	4.80624	4.67609	5.27324	4.05861	4.447	4.41064	4.64722
	△△Ct														△△Ct
	CT				RP				RPS						CT				RP				RPS
F	0.113826	0.0698864	0.124097	-0.316833	0.0611375	-0.133887	0.0201562	-0.535293	0.321928	0.514573	0.736966	1		F	-0.0386167	0.198694	-0.156962	-0.0027356	0.191196	0.416362	0.117834	0.159995	-0.118978	0.396795	-0.279039	-0.572821
3h	-1.67988	-1.52141	-1.46499	-1.51503	-1.48214	-1.47095	-1.78543	-1.69676	-1.37851	-1.26303	-1.43296	-1.1375		3h	-1.74018	-1.43228	-1.53632	-1.8739	-1.27557	-1.66292	-1.53145	-1.89063	-1.00872	-0.967062	-1.53296	-1.47079
6h	-0.266097	-0.377847	0.209501	-0.0202867	-0.0709745	-0.722356	0.703994	0.0759232	-0.522128	-0.513337	-0.63309	0.065286		6h	-1.01579	-1.0629	-1.4063	-1.02914	-0.853953	-0.584859	-0.798231	-1.30458	0.183	-0.543829	-0.364617	-0.0651283
12h	0.25872	0.0454344	0.359496	0.399489	-0.271337	-0.112084	-0.319377	0.0348858	0.321928	0.514573	-0.120686	0.736966		12h	-0.057417	-0.395913	0.822194	0.865747	0.128465	0.136062	-0.0730373	-0.191584	-0.0889652	-0.177901	0.20235	0.325788
24h	0.621073	0.508059	0.757035	0.533101	-0.0612688	-0.15556	0.648417	0.448064	0.736966	1	0.514573	1.4344		24h	0.454194	0.302329	0.326557	-0.0654014	0.555414	0.376245	0.246091	0.843242	-0.371386	0.0169995	-0.0193561	0.217222
	2(-△△Ct)														2(-△△Ct)
	CT				RP				RPS						CT				RP				RPS
F	0.924134	0.952713	0.917578	1.24559	0.958508	1.09725	0.986126	1.44924	0.8	0.7	0.6	0.5		F	1.02713	0.871339	1.11494	1.0019	0.875879	0.749312	0.92157	0.895028	1.08597	0.759544	1.21339	1.48743
3h	3.20402	2.87071	2.76061	2.85805	2.79362	2.77205	3.4472	3.24172	2.6	2.4	2.7	2.2		3h	3.34076	2.69873	2.90054	3.66521	2.42095	3.16657	2.89076	3.70797	2.01213	1.95486	2.89378	2.77173
6h	1.20255	1.2994	0.864837	1.01416	1.05043	1.64987	0.61387	0.948735	1.43607	1.42735	1.55088	0.955756		6h	2.02201	2.08913	2.65056	2.04081	1.80745	1.49989	1.73897	2.47012	0.880869	1.45784	1.28754	1.04618
12h	0.835829	0.968998	0.779437	0.758127	1.20693	1.08079	1.24779	0.976109	0.8	0.7	1.08725	0.6		12h	1.0406	1.31577	0.565581	0.548762	0.914804	0.91	1.05193	1.14202	1.06361	1.13124	0.869134	0.797863
24h	0.650187	0.703168	0.591711	0.691068	1.04338	1.11385	0.63798	0.733026	0.6	0.5	0.7	0.37		24h	0.729918	0.810942	0.797438	1.04638	0.680462	0.77044	0.843178	0.55739	1.2936	0.988286	1.01351	0.860221

## Sheet: INSR
BRAIN														GUT
	INSR (CT)														INSR(CT)
	CT				RP				RPS						CT				RP				RPS
F	24.4905	24.7514	24.1314	24.6131	25.7603	24.6059	26.5335	26.1081	27.1711	25.9232	26.68	26.6686		F	24.0219	24.7867	23.0176	22.1201	23.3829	22.891	23.0689	23.0562	22.5287	23.0953	22.5931	23.1636
3h	21.5922	22.1754	21.5366	21.7707	23.9681	24.1249	24.3738	24.535	24.1487	24.4531	24.4577	23.786		3h	23.6429	23.7633	23.7277	23.5266	24.2781	24.6186	22.7561	22.6844	24.7161	24.1613	22.2356	22.7002
6h	22.4166	23.7256	22.5574	23.4146	24.4658	24.5143	25.0093	25.0197	24.5655	24.4375	24.4098	24.5617		6h	24.3183	24.9976	23.3037	22.9361	24.2096	24.2373	23.0075	22.3723	24.0709	23.6652	23.256	23.1856
12h	23.8106	22.9825	23.3664	23.5192	25.1303	25.2969	24.8122	24.6079	24.6327	24.7661	24.1711	24.0979		12h	25.1109	24.9138	23.3572	24.0385	23.9051	23.5689	23.4705	23.3907	23.7737	23.992	24.1388	24.8636
24h	23.1037	23.4407	22.6454	23.0355	25.4371	24.8513	24.9781	24.9109	24.4723	24.4661	24.0804	24.3064		24h	22.1703	22.5833	21.8954	22.6314	21.8272	22.7033	23.8605	24.6338	23.8183	24.8682	25.3441	24.2928
	GAPDH (CT)														GAPDH (CT)
	CT				RP				RPS						CT				RP				RPS
F	19.4764	19.6216	19.2729	19.6313	21.1388	21.368	21.2682	21.4264	20.9569	20.9666	21.467	21.3477		F	19.7007	20.4888	17.9735	17.5601	19.3986	18.4453	18.9661	18.8032	18.0823	18.8482	18.2293	18.8851
3h	19.0845	19.4747	19.1071	19.5623	21.4317	21.31	21.6888	21.5883	21.2955	21.247	21.1964	20.9539		3h	20.5701	20.7898	20.3324	20.2778	21.2991	21.1722	19.1075	18.9998	21.492	20.4398	18.7639	18.9505
6h	19.2101	20.3016	19.2068	20.0579	21.1971	21.2456	21.3274	21.4525	20.9698	21.2239	20.8138	20.7993		6h	20.5932	20.0947	19.38	19.0284	19.8188	19.5069	18.786	18.4167	18.9352	19.1354	16.247	16.4923
12h	20	19.7155	20	19.8351	22.035	21.7926	21.5868	21.3568	20.8645	20.9078	20.7324	20.6506		12h	19.6708	19.6501	18.9979	18.8581	19.3941	19.862	18.6832	19.0166	18.8363	18.6444	19.5144	19.5987
24h	19.2594	19.738	19.3992	19.7617	21.3197	21.2662	21.527	21.6358	21.1572	21.3066	21.004	21.0238		24h	17.9928	18.0675	18.5	18.6385	18.3205	17.7727	20.1654	19.8731	19.1758	19.2169	20.5913	20.0696
	△Ct														△Ct
	CT				RP				RPS						CT				RP				RPS
F	5.01413	5.12978	4.85852	4.98184	4.62149	3.23794	5.26534	4.68168	6.21418	4.95667	5.21305	5.32093		F	4.32121	4.29789	5.04406	4.56	3.98433	4.44572	4.10282	4.25303	4.44639	4.24709	4.36377	4.27852
3h	2.50775	2.70068	2.42951	2.20837	2.53645	2.81491	2.68494	2.94667	2.8532	3.2061	3.26134	2.83218		3h	3.07274	2.97354	3.39535	3.24876	2.97896	3.44642	3.6486	3.68464	3.22409	3.72146	3.47172	3.74967
6h	3.20649	3.42406	3.3506	3.3567	3.26871	3.26868	3.68187	3.56717	3.59575	3.21363	3.59597	3.76243		6h	3.72511	4.90294	3.9237	3.90763	4.39074	4.73042	4.22142	3.95559	5.13577	4.52975	7.009	6.69331
12h	3.81055	3.26702	3.36636	3.68409	3.09534	3.5043	3.22539	3.25104	3.76817	3.85833	3.4387	3.44732		12h	5.44014	5.26369	4.35928	5.18042	4.51099	3.70694	4.78733	4.3741	4.93738	5.34764	4.62442	5.26497
24h	3.84433	3.70272	3.2462	3.27385	4.11739	3.58517	3.45111	3.27504	3.31506	3.15958	3.07641	3.28258		24h	4.17755	4.51582	3.39535	3.99289	3.50672	4.93063	3.6951	4.76075	4.6425	5.65131	4.75279	4.22326
	△△Ct														△△Ct
	CT				RP				RPS						CT				RP				RPS
F	0.0141305	0.129776	-0.14148	-0.0181621	-0.378512	-1.76206	0.265336	-0.318324	1.21418	-0.0433333	0.213054	0.320926		F	-0.238787	-0.26211	0.484064	0	-0.575674	-0.114283	-0.457178	-0.306973	-0.11361	-0.312909	-0.196229	-0.287477
3h	-2.49225	-2.29932	-2.57049	-2.79163	-2.46355	-2.18509	-2.31506	-2.05333	-2.1468	-1.7939	-1.73866	-2.16782		3h	-1.48726	-1.58646	-1.16465	-1.31124	-1.58104	-1.11358	-0.911402	-0.875359	-1.33591	-0.838536	-1.08828	-0.816334
6h	-1.79351	-1.57594	-1.6494	-1.6433	-1.73129	-1.73132	-1.31813	-1.43283	-1.40425	-1.78637	-1.40403	-1.23757		6h	-0.834893	0.342937	-0.636302	-0.652365	-0.169264	0.170419	-0.338582	-0.604411	0.575769	-0.0302527	2.449	2.12731
12h	-1.18945	-1.73298	-1.63364	-1.31591	-1.90466	-1.4957	-1.77461	-1.74896	-1.23183	-1.14167	-1.5613	-1.55268		12h	0.880136	0.703685	-0.200717	0.62042	-0.0490117	-0.853055	0.227329	-0.185901	0.377379	0.787637	0.0644196	0.698967
24h	-1.15567	-1.29728	-1.7538	-1.72615	-0.882611	-1.41483	-1.54889	-1.72496	-1.68494	-1.84042	-1.92359	-1.71742		24h	-0.382453	-0.0441843	-1.16465	-0.567107	-1.05328	0.370631	-0.864897	0.200746	0.0824995	1.09131	0.192793	-0.342741
	2(-△△Ct)														2(-△△Ct)
	CT				RP				RPS						CT				RP				RPS
F	0.990253	0.913973	1.10304	1.01267	1.3	3.39182	0.832005	1.24688	0.431017	1.03049	0.862709	0.800556		F	1.18	1.19923	0.714961	1	1.49037	1.08244	1.37285	1.23711	1.08193	1.24221	1.1457	1.2205
3h	5.62656	4.92226	5.9401	6.92412	5.51573	4.54754	4.97626	4.15062	4.42846	3.46752	3.33725	4.49344		3h	2.80356	3.00311	2.24178	2.48155	2.99185	2.16381	1.88087	1.83447	2.52435	1.78823	2.1262	1.76093
6h	3.46658	2.9813	3.13704	3.1238	3.32024	3.32033	2.49343	2.69976	2.6468	3.44946	2.64639	2.35801		6h	1.78373	0.788435	1.55434	1.57174	1.12448	0.888585	1.26451	1.52036	0.670929	1.02119	0.183138	0.228885
12h	2.28066	3.32414	3.10294	2.4896	3.74422	2.82	3.42146	3.36117	2.34864	2.20636	2.9512	2.93362		12h	0.543316	0.614002	1.14927	0.650482	1.03456	1.80632	0.854215	1.13753	0.769835	0.579292	0.95633	0.616013
24h	2.22788	2.45766	3.37245	3.30843	1.84371	2.66628	2.92593	3.30572	3.21527	3.58115	3.79367	3.28847		24h	1.30356	1.0311	2.24178	1.48155	2.07524	0.773444	1.82121	0.870101	0.94442	0.469335	0.87491	1.26816
